# Supplementary material for: High-density ddRAD linkage and yield-related QTL mapping delimits a chromosomal region responsible for oil content in rapeseed (Brassica napus L.)
Source: PubMed Central journal article supplement — Breed Sci. 2017 Jun 1;67(3):296–306. doi: 10.1270/jsbbs.16116 (PMC5515304; doi:10.1270/jsbbs.16116), 2017-06-01
Supplement: 67_16116_1.pdf [file 67_16116_1.pdf]

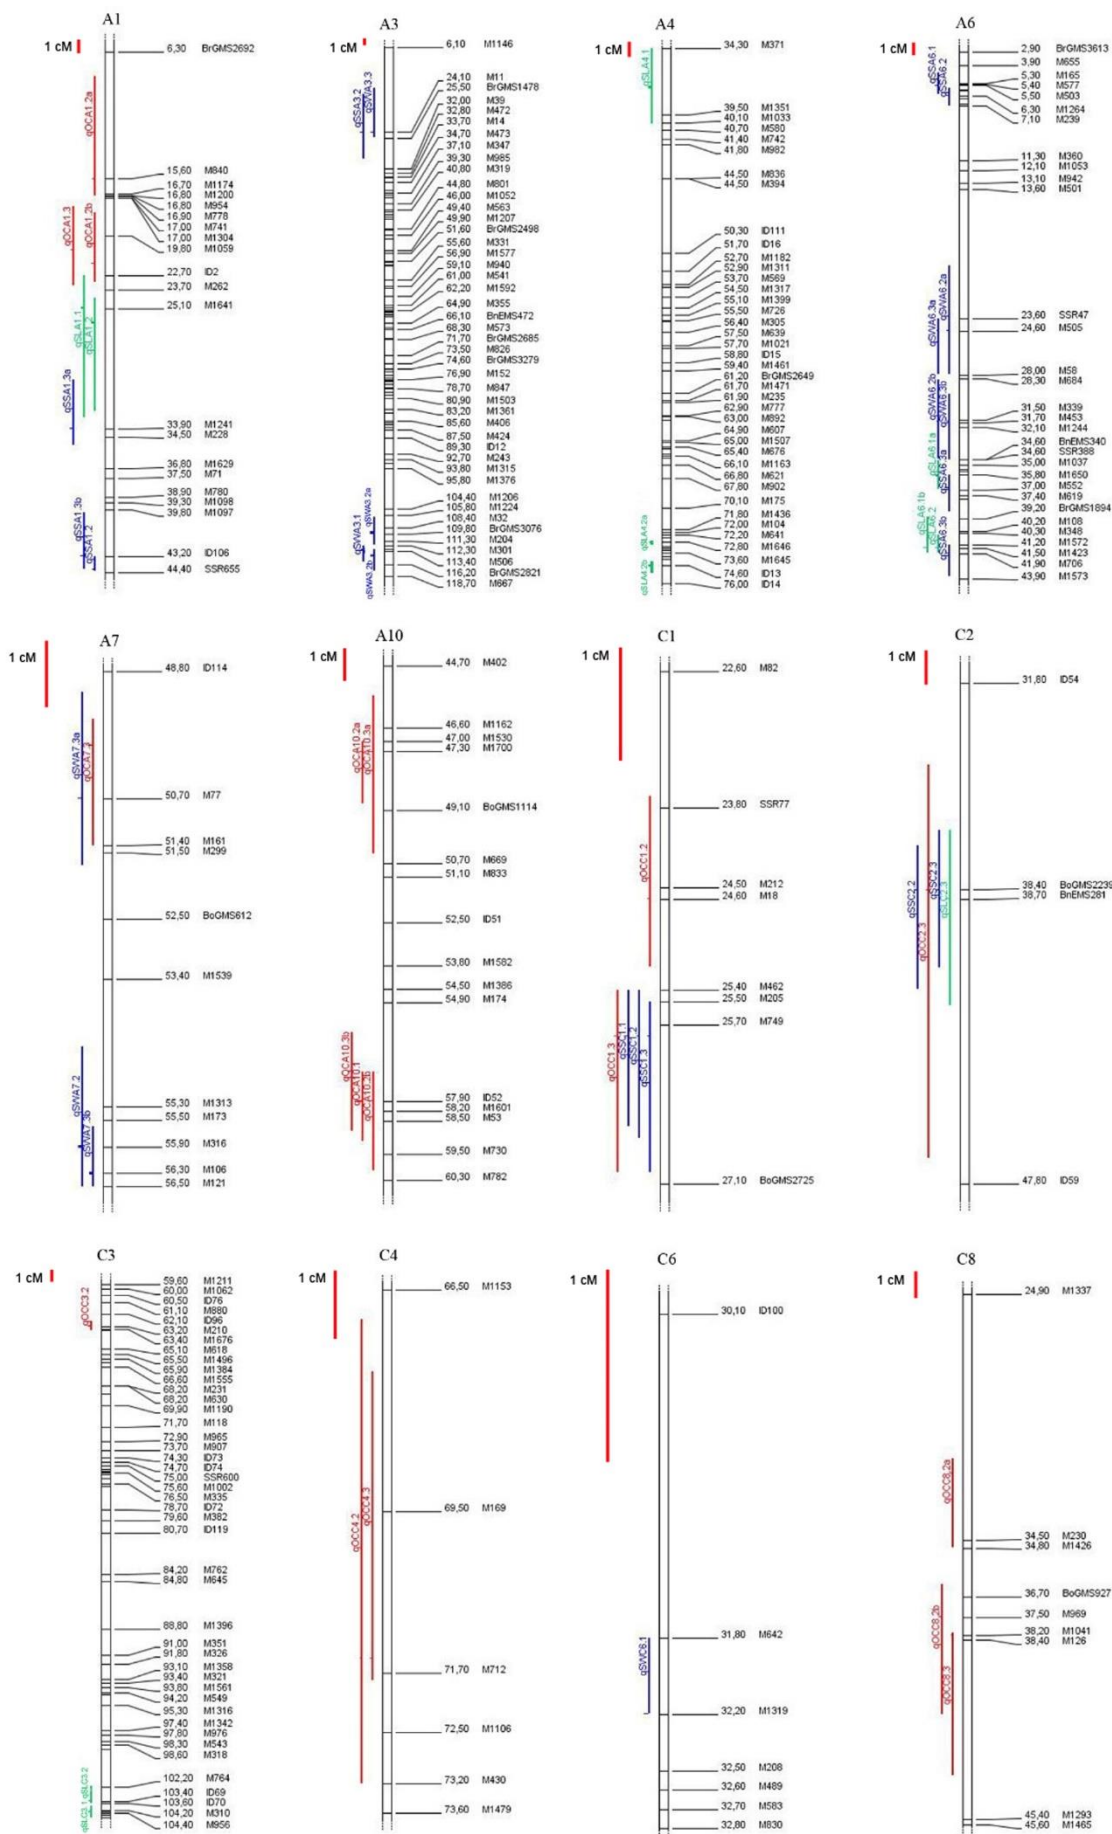

**Supplemental Fig.1.** Map locations of QTL for seed oil content, silique length, seeds per silique, and seed weight in all environments. For simplicity only the markers in the QTL confidence intervals, along with the QTL-containing chromosomes are show. The color of the lines was used to distinguish the different traits located in the same region, and the red scale bars at the top left of each chromosome are 1 cM.
