# Supplementary material for: High-density ddRAD linkage and yield-related QTL mapping delimits a chromosomal region responsible for oil content in rapeseed (Brassica napus L.)
Source: PubMed Central journal article supplement — Breed Sci. 2017 Jun 1;67(3):296–306. doi: 10.1270/jsbbs.16116 (PMC5515304; doi:10.1270/jsbbs.16116), 2017-06-01
Supplement: 67_16116_2.pdf [file 67_16116_2.pdf]

**Supplemental Table 1.** Two-way ANOVA and the broad-sense heritability ( $h_B^2$ ) of the four traits in the RILs grown in the Y12 and Y13 environments

| Trait | Source                 | Sum of square | <i>df</i> | Mean square | <i>F</i> value | <i>P</i> | $H_B^2$ (%) |
|-------|------------------------|---------------|-----------|-------------|----------------|----------|-------------|
| OC    | Genotype               | 10589.86      | 180       | 58.83       | 9.69           | < 0.01   | 78.8        |
|       | Environment            | 6162.12       | 1         | 6162.12     | 1015.35        | < 0.01   |             |
|       | Genotype × environment | 1901.21       | 180       | 10.56       | 1.74           | < 0.01   |             |
|       | Error                  | 4393.943      | 724       | 6.07        |                |          |             |
| SL    | Genotype               | 277.44        | 169       | 1.64        | 23.99          | < 0.01   | 89.4        |
|       | Environment            | 9.14          | 1         | 9.15        | 133.71         | < 0.01   |             |
|       | Genotype × environment | 31.69         | 169       | 0.19        | 2.74           | < 0.01   |             |
|       | Error                  | 46.53         | 680       | 0.07        |                |          |             |
| SS    | Genotype               | 7800.40       | 174       | 44.83       | 9.96           | < 0.01   | 78.5        |
|       | Environment            | 2086.10       | 1         | 2086.10     | 463.28         | < 0.01   |             |
|       | Genotype × environment | 1563.91       | 174       | 8.99        | 2.00           | < 0.01   |             |
|       | Error                  | 3152          | 700       | 4.50        |                |          |             |
| SW    | Genotype               | 151.86        | 185       | 0.82        | 12.93          | < 0.01   | 81.9        |
|       | Environment            | 0.92          | 1         | 0.92        | 14.42          | < 0.01   |             |
|       | Genotype × environment | 28.74         | 185       | 0.16        | 2.45           | < 0.01   |             |
|       | Error                  | 47.25         | 744       | 0.06        |                |          |             |

OC oil content, SL silique length, SS seeds per silique, SW seed weight

**Supplemental Table 2.** Phenotypic correlation analyses for the four traits in three environments

|     |    | OC      | SL      | SS      | SW |
|-----|----|---------|---------|---------|----|
| Y11 | OC |         |         |         |    |
|     | SL | 0.264*  |         |         |    |
|     | SS | 0.302** | 0.534** |         |    |
|     | SW | 0.300** | 0.263*  | -0.095  |    |
| Y12 | OC |         |         |         |    |
|     | SL | 0.279*  |         |         |    |
|     | SS | 0.331** | 0.449** |         |    |
|     | SW | -0.003  | 0.274*  | -0.272* |    |
| Y13 | OC |         |         |         |    |
|     | SL | 0.337** |         |         |    |
|     | SS | 0.381** | 0.513** |         |    |
|     | SW | 0.206*  | 0.211*  | -0.224* |    |

OC oil content, SL silique length, SS seeds per silique, SW seed weight

\* Indicates significant at level of  $P < 0.05$

\*\* Indicates significant at level of  $P < 0.01$ .

**Supplemental Table 3.** Genetic correlations analyses for the four traits in two environments

|     |    | OC     | SL     | SS     | SW |
|-----|----|--------|--------|--------|----|
| Y12 | OC |        |        |        |    |
|     | SL | 0.48** |        |        |    |
|     | SS | 0.49** | 0.48** |        |    |
|     | SW | 0.31** | 0.43** | -0.13* |    |
| Y13 | OC |        |        |        |    |
|     | SL | 0.53** |        |        |    |
|     | SS | 0.49** | 0.58** |        |    |
|     | SW | 0.35** | 0.38** | -0.11* |    |

OC oil content, SL silique length, SS seeds per silique, SW seed weight

\* Indicates significant at level of  $P < 0.05$

\*\* Indicates significant at level of  $P < 0.01$

**Supplemental Table 4.** Summary of restriction site associated DNA (RAD) sequencing results from the 192 *B. napus* recombinant inbred lines (RILs)

| Item                                | Value          |
|-------------------------------------|----------------|
| Total Illumina reads, $\times 10^6$ | 68.45          |
| Total RAD tags, $\times 10^6$       | 15.16          |
| RAD tags per inbred                 | 39092 - 172934 |
| Mean of tags per inbred             | 80631          |
| Mean of reads per RAD tag           | 4.5            |
| Median of reads per RAD tag         | 4.4            |
| Total common RAD tags               | 96435          |
| Total RAD loci                      | 12786          |
| Total polymorphisms                 | 1700           |

**Supplemental Table 5.** quantitative trait loci (QTLs) detected in the recombinant inbred line (RIL) population in three environments

| QTL               | Linkage group | Peak position (cM) | Confidence interval | LOD | Additive effect | R <sup>2</sup> (%) | Environment | QTL in Ref                               |
|-------------------|---------------|--------------------|---------------------|-----|-----------------|--------------------|-------------|------------------------------------------|
| <i>qOCA10.1*</i>  | A10           | 57.9               | 57.0–59.1           | 5.4 | 1.41            | 10.9               | Y11         |                                          |
| <i>qSLA4.1*</i>   | A04           | 37.3               | 34.3–40.2           | 3.6 | -0.19           | 7.7                | Y11         |                                          |
| <i>qSLA6.1a*</i>  | A06           | 35.8               | 34.7–37.0           | 4.7 | 0.21            | 9.2                | Y11         |                                          |
| <i>qSLA6.1b*</i>  | A06           | 41.5               | 39.1–41.9           | 4.8 | 0.21            | 9.2                | Y11         |                                          |
| <i>qSSA6.1*</i>   | A06           | 5.5                | 4.5–6.2             | 3.6 | -0.86           | 6.7                | Y11         |                                          |
| <i>qSWC6.1*</i>   | C06           | 32.2               | 31.8–32.2           | 5.5 | 0.16            | 11.7               | Y11         |                                          |
| <i>qSLA1.1</i>    | A01           | 25.1               | 22.7 – 33.1         | 2.2 | 0.14            | 4.2                | Y11         |                                          |
| <i>qSWA3.1</i>    | A03           | 113.0              | 112.3 – 115.8       | 2.2 | -0.10           | 4.6                | Y11         |                                          |
| <i>qSSC1.1</i>    | C01           | 25.8               | 25.4 – 26.6         | 3.0 | 0.87            | 6.4                | Y11         |                                          |
| <i>qSLC3.1</i>    | C03           | 104.3              | 103.8 – 104.8       | 2.4 | 0.15            | 4.7                | Y11         | <i>cqSLC3b</i> Yang <i>et al.</i> (2012) |
| <i>qOCA1.2a*</i>  | A01           | 15.6               | 8.1–16.9            | 3.2 | 0.68            | 5.1                | Y12         |                                          |
| <i>qOCA1.2b*</i>  | A01           | 21.8               | 18.1–23.2           | 3.8 | 0.78            | 6.6                | Y12         |                                          |
| <i>qOCA10.2a*</i> | A10           | 47.3               | 47.0–48.9           | 4.1 | 0.84            | 7.6                | Y12         |                                          |
| <i>qOCA10.2b*</i> | A10           | 57.9               | 57.0–60.0           | 7.6 | 1.08            | 12.8               | Y12         |                                          |
| <i>qOCC1.2*</i>   | C01           | 24.6               | 23.7–25.2           | 3.2 | 0.74            | 4.7                | Y12         |                                          |
| <i>qOCC3.2*</i>   | C03           | 63.1               | 62.7–63.5           | 4.2 | 0.84            | 7.4                | Y12         |                                          |
| <i>qOCC8.2a*</i>  | C08           | 31.9               | 31.3–34.8           | 3.4 | 0.78            | 6.6                | Y12         | <i>qOC-8-2</i> Wang <i>et al.</i> (2013) |
| <i>qOCC8.2b*</i>  | C08           | 37.5               | 36.2–41.3           | 4.5 | 0.83            | 7.4                | Y12         |                                          |
| <i>qSLA1.2*</i>   | A01           | 26.1               | 24.3–32.6           | 4.1 | 0.16            | 7.4                | Y12         |                                          |
| <i>qSLA4.2a*</i>  | A04           | 72.8               | 72.7–73.0           | 4.1 | -0.15           | 7.1                | Y12         |                                          |
| <i>qSLA4.2b*</i>  | A04           | 74.6               | 74.3–75.2           | 5.0 | -0.17           | 8.4                | Y12         |                                          |

| QTL               | Linkage group | Peak position (cM) | Confidence interval | LOD | Additive effect | R <sup>2</sup> (%) | Environment | QTL in Ref                                 |
|-------------------|---------------|--------------------|---------------------|-----|-----------------|--------------------|-------------|--------------------------------------------|
| <i>qSLA6.2*</i>   | A06           | 41.5               | 40.5–41.9           | 4.2 | 0.15            | 7.0                | Y12         |                                            |
| <i>qSSA3.2*</i>   | A03           | 24.1               | 16.1–30.0           | 4.0 | -0.80           | 7.5                | Y12         |                                            |
| <i>qSSA6.2*</i>   | A06           | 6.3                | 5.7–7.1             | 3.9 | -0.81           | 7.6                | Y12         |                                            |
| <i>qSSC2.2*</i>   | C02           | 38.4               | 37.0–41.6           | 3.6 | 0.81            | 6.6                | Y12         |                                            |
| <i>qSWA3.2*a</i>  | A03           | 109.4              | 106.2–112.3         | 4.8 | -0.12           | 8.3                | Y12         | <i>qSL.N3-3</i> Zhang <i>et al.</i> (2011) |
| <i>qSWA3.2b*</i>  | A03           | 114.4              | 113.0–117.6         | 4.4 | -0.11           | 7.8                | Y12         |                                            |
| <i>qSWA7.2*</i>   | A07           | 55.9               | 54.4–56.5           | 4.0 | 0.11            | 7.0                | Y12         |                                            |
| <i>qSSA1.2</i>    | A01           | 44.2               | 43.2 – 44.3         | 2.9 | 0.68            | 5.5                | Y12         |                                            |
| <i>qSWA6.2a</i>   | A06           | 24.6               | 19.5 – 28.0         | 2.8 | 0.09            | 4.1                | Y12         |                                            |
| <i>qSWA6.2b</i>   | A06           | 31.6               | 28.4 – 34.6         | 2.3 | 0.08            | 3.8                | Y12         |                                            |
| <i>qSSC1.2</i>    | C01           | 25.8               | 25.4 – 26.7         | 2.8 | 0.71            | 5.4                | Y12         |                                            |
| <i>qSLC3.2</i>    | C03           | 103.4              | 102.1 – 103.6       | 2.8 | 0.13            | 4.7                | Y12         |                                            |
| <i>qOCC4.2</i>    | C04           | 71.5               | 66.9 – 73.2         | 2.4 | 0.58            | 3.7                | Y12         |                                            |
| <i>qOCA7.3*</i>   | A07           | 49.9               | 49.5–51.4           | 5.7 | 1.32            | 10.7               | Y13         | <i>oilA7-1</i> Jiang <i>et al.</i> (2014)  |
| <i>qOCA10.3*a</i> | A10           | 47.3               | 45.6–50.4           | 6.8 | 1.37            | 11.9               | Y13         |                                            |
| <i>qOCA10.3b*</i> | A10           | 57                 | 55.8–58.8           | 5.3 | 1.24            | 9.8                | Y13         |                                            |
| <i>qOCC1.3*</i>   | C01           | 25.8               | 25.4–27.0           | 3.6 | 1.06            | 6.5                | Y13         |                                            |
| <i>qOCC2.3*</i>   | C02           | 38.4               | 34.4–47.0           | 3.4 | 1.00            | 5.6                | Y13         | <i>oilC2-3</i> Jiang <i>et al.</i> (2014)  |
| <i>qSLC2.3*</i>   | C02           | 38.7               | 36.5–42.1           | 5.0 | 0.19            | 9.5                | Y13         | <i>cqSLC2</i> Yang <i>et al.</i> (2012)    |
| <i>qSSA1.3a*</i>  | A01           | 33.9               | 30.3–35.1           | 3.8 | 0.83            | 6.7                | Y13         |                                            |
| <i>qSSA1.3b*</i>  | A01           | 43.2               | 40.0–44.2           | 3.6 | 0.80            | 6.3                | Y13         |                                            |
| <i>qSSA6.3a*</i>  | A06           | 36.8               | 35.8–38.7           | 4.3 | -0.93           | 8.5                | Y13         |                                            |
| <i>qSSA6.3b*</i>  | A06           | 41.9               | 41.2–43.7           | 4.0 | -0.86           | 7.1                | Y13         |                                            |
| <i>qSSC2.3*</i>   | C02           | 38.4               | 36.5–40.9           | 3.8 | 0.87            | 6.7                | Y13         |                                            |
| <i>qSWA3.3*</i>   | A03           | 24.1               | 14.8–25.4           | 3.8 | 0.11            | 7.2                | Y13         |                                            |

| QTL               | Linkage group | Peak position (cM) | Confidence interval | LOD | Additive effect | R <sup>2</sup> (%) | Environment | QTL in Ref                                |
|-------------------|---------------|--------------------|---------------------|-----|-----------------|--------------------|-------------|-------------------------------------------|
| <i>qSWA7.3a</i> * | A07           | 50.7               | 49.1–51.7           | 4.8 | 0.13            | 9.2                | Y13         | <i>TSWA7a-06</i> Fan <i>et al.</i> (2010) |
| <i>qSWA7.3b</i> * | A07           | 56.3               | 55.6–56.5           | 4.1 | 0.11            | 6.7                | Y13         |                                           |
| <i>qOCA1.3</i>    | A01           | 20.8               | 17.6 – 23.4         | 2.5 | 0.82            | 4.2                | Y13         |                                           |
| <i>qSWA6.3a</i>   | A06           | 24.6               | 23.6 – 28.0         | 2.4 | 0.09            | 3.1                | Y13         |                                           |
| <i>qSWA6.3b</i>   | A06           | 31.6               | 29.5 – 34.6         | 2.4 | 0.09            | 4.2                | Y13         |                                           |
| <i>qSSC1.3</i>    | C01           | 25.8               | 25.5 – 27.0         | 3.1 | 0.79            | 5.6                | Y13         |                                           |
| <i>qOCC4.3</i>    | C04           | 71.5               | 67.6 – 71.8         | 2.6 | 0.81            | 4.1                | Y13         |                                           |
| <i>qOCC8.3</i>    | C08           | 38.2               | 38.1 – 43.7         | 2.2 | 0.74            | 3.5                | Y13         |                                           |

All QTLs were prefixed with “*q*”, followed by the abbreviated trait name, mapped linkage group, a numerical code (1, 2, or 3) for one of the three environments, and a small alphabet (a, b, ...) representing multiple QTLs if they are detected for the trait in the same linkage group and same environment. For example, *qOCA1.2a* is one of the two QTLs for oil content (OC) detected on linkage A1 in the environment in 2012 (Y12), and *qOCA1.2b* is another one.

Confidence interval: the flanking marker closest to the 95% confidence interval was used for significant QTLs; R<sup>2</sup>: percentage of the phenotypic variation explained by the QTL

Additive effects indicate the effects of “M201” allele

\* Indicates significant QTLs

QTL in Ref were the QTL detected in previous studies. The references for the QTL were also shown in the same column.

**Supplemental Table 6.** Candidate genes discovered underlying the QTL identified for A10 OC QTL (*cqOCA10b*)

| Item | Name             | Chromosome | Start   | Stop    | Strand | Annotations                                                                                                                                               | Orthologous genes to<br><i>A. thaliana</i> |
|------|------------------|------------|---------|---------|--------|-----------------------------------------------------------------------------------------------------------------------------------------------------------|--------------------------------------------|
| Gene | Bra015344        | A10        | 1897084 | 1905661 | +      | DNA-dependent DNA replication, sister chromatid cohesion                                                                                                  |                                            |
| Gene | Bra015345        | A10        | 1894813 | 1896427 | +      | vesicle-mediated transport; Biological Process; integral to membrane; Cellular Component                                                                  |                                            |
| Gene | Bra015346        | A10        | 1883582 | 1884778 | +      | cellular response to sulfur starvation, chloroplast organization                                                                                          |                                            |
| Gene | Bra015347        | A10        | 1871022 | 1873881 | -      | Putative endonuclease or glycosyl hydrolase                                                                                                               |                                            |
| Gene | Bra015348        | A10        | 1868282 | 1870326 | +      | Ankyrin repeat family protein                                                                                                                             |                                            |
| Gene | <b>Bra015349</b> | A10        | 1862605 | 1865057 | -      | RING/U-box superfamily protein; fatty acid beta-oxidation, protein import into peroxisome matrix                                                          | <b>AT1G04790</b>                           |
| Gene | Bra015350        | A10        | 1861514 | 1862104 | +      | glycine-rich protein                                                                                                                                      |                                            |
| Gene | Bra015351        | A10        | 1858421 | 1860649 | +      | Ypt/Rab-GAP domain of gyp1p superfamily protein; cytoplasm; FUNCTIONS IN: RAB GTPase activator activity                                                   |                                            |
| Gene | Bra015352        | A10        | 1850061 | 1852793 | +      | F-box and Leucine Rich Repeat domains containing protein                                                                                                  |                                            |
| Gene | Bra015353        | A10        | 1847843 | 1849334 | +      | F-box and Leucine Rich Repeat domains containing protein                                                                                                  |                                            |
| Gene | Bra015354        | A10        | 1843347 | 1844040 | +      | FLAVODOXIN-LIKE QUINONE REDUCTASE 1, FQR1;Encodes a flavin mononucleotide-binding flavodoxin-like quinone reductase that is a primary auxin-response gene |                                            |
| Gene | Bra015355        | A10        | 1836111 | 1837157 | +      | RNI-like superfamily protein;                                                                                                                             |                                            |
| Gene | Bra015356        | A10        | 1832558 | 1833928 | +      | Ypt/Rab-GAP domain of gyp1p superfamily protein                                                                                                           |                                            |
| Gene | Bra015357        | A10        | 1821062 | 1827681 | +      | Tetratricopeptide repeat (TPR)-like superfamily protein                                                                                                   |                                            |
| Gene | Bra015358        | A10        | 1818251 | 1820015 | +      | HMG (high mobility group) box protein with ARID/BRIGHT DNA-binding domain; FUNCTIONS IN: sequence-specific DNA binding transcription factor activity      |                                            |



| Item | Name      | Chromosome | Start   | Stop    | Strand | Annotations                                                                                                                                                                                                                                           | Orthologous genes to<br><i>A. thaliana</i> |
|------|-----------|------------|---------|---------|--------|-------------------------------------------------------------------------------------------------------------------------------------------------------------------------------------------------------------------------------------------------------|--------------------------------------------|
| Gene | Bra015359 | A10        | 1813124 | 1814020 | -      | TRAF-like superfamily protein;                                                                                                                                                                                                                        |                                            |
| Gene | Bra015360 | A10        | 1805681 | 1807555 | +      | Intermediate filament protein                                                                                                                                                                                                                         |                                            |
| Gene | Bra015361 | A10        | 1799613 | 1802674 | +      | Encodes a twin-domain, kinase-GC signaling molecule that may function in biotic stress responses that is critically dependent on the second messenger cGMP                                                                                            |                                            |
| Gene | Bra015362 | A10        | 1794695 | 1797807 | -      | Protein of unknown function (DUF185); CONTAINS InterPro DOMAIN/s                                                                                                                                                                                      |                                            |
| Gene | Bra015363 | A10        | 1791651 | 1794224 | +      | O-fucosyltransferase family protein; CONTAINS InterPro DOMAIN/s: GDP-fucose protein O-fucosyltransferase                                                                                                                                              |                                            |
| Gene | Bra015364 | A10        | 1786183 | 1789925 | +      | Encodes a protein with putative sucrose-phosphate synthase activity; galactolipid biosynthetic process, response to hypoxia, sucrose biosynthetic process                                                                                             | AT1G04920                                  |
| Gene | Bra015365 | A10        | 1783806 | 1785089 | -      | Putative uncharacterized protein                                                                                                                                                                                                                      |                                            |
| Gene | Bra015366 | A10        | 1779406 | 1781683 | +      | hydroxyproline-rich glycoprotein family protein                                                                                                                                                                                                       |                                            |
| Gene | Bra015367 | A10        | 1777984 | 1778925 | -      | TRANSLOCON AT THE INNER ENVELOPE MEMBRANE OF CHLOROPLASTS 20                                                                                                                                                                                          |                                            |
| Gene | Bra015368 | A10        | 1773936 | 1777526 | +      | TATA BOX ASSOCIATED FACTOR II 59                                                                                                                                                                                                                      |                                            |
| Gene | Bra015369 | A10        | 1766272 | 1768503 | +      | Protein of unknown function                                                                                                                                                                                                                           |                                            |
| Gene | Bra015370 | A10        | 1764626 | 1765733 | +      | Encodes a protein belonging to the mitochondrial carrier family and similar to animal mitoferrin but likely NOT to be located in the mitochondria, but rather in chloroplasts. It is likely to be involved in transporting iron into the chloroplast. |                                            |
| Gene | Bra015371 | A10        | 1761563 | 1763816 | -      | lipid-binding serum glycoprotein family protein; FUNCTIONS IN: lipid binding;                                                                                                                                                                         | AT1G04970                                  |

| Item | Name      | Chromosome | Start   | Stop    | Strand | Annotations                                                                                                                                                                                                                                                                                               | Orthologous genes to<br><i>A. thaliana</i> |
|------|-----------|------------|---------|---------|--------|-----------------------------------------------------------------------------------------------------------------------------------------------------------------------------------------------------------------------------------------------------------------------------------------------------------|--------------------------------------------|
| Gene | Bra015372 | A10        | 1759456 | 1760755 | -      | Encodes a Ca-dependent calmodulin binding protein. Sequence similarity to the WRKY transcription factor gene family                                                                                                                                                                                       |                                            |
| Gene | Bra015373 | A10        | 1755280 | 1756347 | -      | cysteine-type endopeptidase inhibitor                                                                                                                                                                                                                                                                     |                                            |
| Gene | Bra015374 | A10        | 1748282 | 1750995 | -      | Encodes auxin response factor 9 (ARF9).                                                                                                                                                                                                                                                                   |                                            |
| Gene | Bra015375 | A10        | 1739233 | 1741963 | +      | ARABIDOPSIS THALIANA PROTEIN DISULFIDE ISOMERASE 10, ATPDI10, ATPDIL2-2, PDI-LIKE 2-2, PDI10, PDIL2-2, PROTEIN DISULFIDE ISOMERASE                                                                                                                                                                        |                                            |
| Gene | Bra015376 | A10        | 1736510 | 1738599 | +      | Zinc finger C-x8-C-x5-C-x3-H type family protein; FUNCTIONS IN: zinc ion binding, nucleic acid binding;                                                                                                                                                                                                   |                                            |
| Gene | Bra015377 | A10        | 1736510 | 1737909 | +      | zinc finger (CCCH-type) family protein                                                                                                                                                                                                                                                                    |                                            |
| Gene | Bra015378 | A10        | 1722786 | 1727170 | +      | Encodes a DNA glycosylase DEMETER (DME). Responsible for endosperm maternal-allele-specific hypomethylation at the MEDEA (MEA) gene. DME can excise 5-methylcytosine in vitro and when expressed in E. coli. DME establishes MEA imprinting by removing 5-methylcytosine to activate the maternal allele. |                                            |
| Gene | Bra015379 | A10        | 1714458 | 1717280 | -      | Encodes an atypical dual-specificity phosphatase                                                                                                                                                                                                                                                          | AT1G05000                                  |
| Gene | Bra015380 | A10        | 1712686 | 1713989 | +      | Encodes 1-aminocyclopropane-1-carboxylate oxidase                                                                                                                                                                                                                                                         |                                            |
| Gene | Bra015381 | A10        | 1705608 | 1707521 | +      | ENTH/ANTH/VHS superfamily protein; FUNCTIONS IN: phospholipid binding, clathrin binding, binding, phosphatidylinositol binding;                                                                                                                                                                           |                                            |
| Gene | Bra015382 | A10        | 1702721 | 1704355 | +      | receptor like protein 20 (RLP20); FUNCTIONS IN: kinase activity; INVOLVED IN: signal transduction;                                                                                                                                                                                                        |                                            |
| Gene | Bra015383 | A10        | 1692420 | 1692872 | +      | unknown protein                                                                                                                                                                                                                                                                                           |                                            |
| Gene | Bra015384 | A10        | 1688427 | 1690058 | -      | receptor like protein 20 (RLP20); FUNCTIONS IN: kinase activity; INVOLVED IN: signal transduction;                                                                                                                                                                                                        |                                            |

| Item | Name      | Chromosome | Start   | Stop    | Strand | Annotations                                                                                                                                                                                                                                        | Orthologous genes to<br><i>A. thaliana</i> |
|------|-----------|------------|---------|---------|--------|----------------------------------------------------------------------------------------------------------------------------------------------------------------------------------------------------------------------------------------------------|--------------------------------------------|
| Gene | Bra015385 | A10        | 1687498 | 1687731 | +      | Member of a large family of putative ligands homologous to the Clavata3 gene. Consists of a single exon.                                                                                                                                           |                                            |
| Gene | Bra015386 | A10        | 1683789 | 1684750 | +      | unknown protein                                                                                                                                                                                                                                    |                                            |
| Gene | Bra015387 | A10        | 1681177 | 1683502 | -      | dentin sialophosphoprotein-related                                                                                                                                                                                                                 |                                            |
| Gene | Bra015388 | A10        | 1670618 | 1671631 | -      | member of MEKK subfamily; activation of protein kinase activity, regulation of apoptotic process, regulation of mitotic cell cycle, stress-activated MAPK cascade                                                                                  |                                            |
| Gene | Bra015389 | A10        | 1665848 | 1669772 | +      | Helicase protein with RING/U-box domain; FUNCTIONS IN: helicase activity, DNA binding, zinc ion binding, ATP binding, nucleic acid binding;                                                                                                        |                                            |
| Gene | Bra015390 | A10        | 1643145 | 1644134 | -      | ubiquitin carrier protein                                                                                                                                                                                                                          |                                            |
| Gene | Bra015391 | A10        | 1636359 | 1637645 | -      | Peptidase M50 family protein; FUNCTIONS IN: metalloendopeptidase activity;                                                                                                                                                                         |                                            |
| Gene | Bra015392 | A10        | 1632191 | 1636110 | +      | Helicase protein with RING/U-box domain; FUNCTIONS IN: helicase activity, DNA binding, zinc ion binding, ATP binding, nucleic acid binding;                                                                                                        |                                            |
| Gene | Bra015393 | A10        | 1629054 | 1631489 | +      | Calcium-binding tetratricopeptide family protein; FUNCTIONS IN: binding, zinc ion binding, calcium ion binding;                                                                                                                                    |                                            |
| Gene | Bra015394 | A10        | 1625834 | 1628206 | +      | "CYTOCHROME P450, FAMILY 88, SUBFAMILY A, POLYPEPTIDE 3", ATKA01, CYP88A3, ENT-KAURENOIC ACID OXYDASE 1, KAO1                                                                                                                                      |                                            |
| Gene | Bra015395 | A10        | 1621610 | 1624875 | +      | Galactosyltransferase family protein; FUNCTIONS IN: transferase activity, transferring hexosyl groups, transferase activity, transferring glycosyl groups;                                                                                         | AT1G05170                                  |
| Gene | Bra015396 | A10        | 1609018 | 1611995 | +      | Encodes a subunit of the RUB1 activating enzyme that regulates the protein degradation activity of Skp1-Cullin-Fbox complexes, primarily, but not exclusively, affecting auxin responses. Acts alongside AS1 to exclude BP expression from leaves. |                                            |

| Item | Name      | Chromosome | Start   | Stop    | Strand | Annotations                                                                                                                                                                                                                                                           | Orthologous genes to<br><i>A. thaliana</i> |
|------|-----------|------------|---------|---------|--------|-----------------------------------------------------------------------------------------------------------------------------------------------------------------------------------------------------------------------------------------------------------------------|--------------------------------------------|
| Gene | Bra015397 | A10        | 1607137 | 1608298 | +      | embryo defective 2394 (emb2394); FUNCTIONS IN: structural constituent of ribosome, rRNA binding; INVOLVED IN: translation, embryo development ending in seed dormancy                                                                                                 |                                            |
| Gene | Bra015398 | A10        | 1599853 | 1602929 | -      | Encodes a putative glutamate receptor GLR3 with dual localization in plastid and plasma membrane.                                                                                                                                                                     |                                            |
| Gene | Bra015399 | A10        | 1598672 | 1599488 | +      | unknown protein                                                                                                                                                                                                                                                       |                                            |
| Gene | Bra015400 | A10        | 1597567 | 1598398 | -      | Transmembrane protein 97                                                                                                                                                                                                                                              |                                            |
| Gene | Bra015401 | A10        | 1593110 | 1596759 | +      | Encodes a homeobox-leucine zipper family protein belonging to the HD-ZIP IV family. Mutants have trichomes that appear glass-like under a dissecting microscope as compared to the wild-type trichomes. The mutations do not affect trichome growth or branch number. |                                            |
| Gene | Bra015402 | A10        | 1585992 | 1587331 | -      | Encodes a cationic cell-wall-bound peroxidase homolog that is involved in the lignification of cell walls.                                                                                                                                                            |                                            |
| Gene | Bra015403 | A10        | 1582382 | 1583703 | +      | Encodes a cationic cell-wall-bound peroxidase homolog that is involved in the lignification of cell walls.                                                                                                                                                            |                                            |
| Gene | Bra015404 | A10        | 1578655 | 1580080 | -      | Encodes a cold-inducible cationic peroxidase that is involved in the stress response. In response to low temperature, RCI3 transcripts accumulate in the aerial part and in roots of etiolated seedlings but only in roots of light-grown seedlings.                  |                                            |
| Gene | Bra015405 | A10        | 1576054 | 1578342 | +      | TraB family protein; CONTAINS InterPro DOMAIN/s: Pheromone shutdown-related, TraB (InterPro:IPR002816);                                                                                                                                                               |                                            |
| Gene | Bra015406 | A10        | 1573945 | 1574433 | -      | Mono-/di-acylglycerol lipase, N-terminal;Lipase, class 3; FUNCTIONS IN: triglyceride lipase activity, carboxylesterase activity; INVOLVED IN: lipid catabolic process, lipid metabolic process;                                                                       | AT3G14075                                  |

| Item | Name      | Chromosome | Start   | Stop    | Strand | Annotations                                                                                                                                                                                                                                           | Orthologous genes to<br><i>A. thaliana</i> |
|------|-----------|------------|---------|---------|--------|-------------------------------------------------------------------------------------------------------------------------------------------------------------------------------------------------------------------------------------------------------|--------------------------------------------|
| Gene | Bra015407 | A10        | 1569148 | 1569501 | +      | TraB family protein; CONTAINS InterPro DOMAIN/s: Pheromone shutdown-related,                                                                                                                                                                          |                                            |
| Gene | Bra015408 | A10        | 1567666 | 1568616 | -      | NAC domain protein. SMB, BRN1, and BRN2 act to regulate root cap maturation, in a partially redundant fashion. BRN1 and BRN2, control the cell wall maturation processes that are required to detach root cap layers from the root.                   |                                            |
| Gene | Bra015409 | A10        | 1561253 | 1563709 | +      | Protein of unknown function                                                                                                                                                                                                                           |                                            |
| Gene | Bra015410 | A10        | 1556441 | 1556692 | +      | TraB family protein; CONTAINS InterPro DOMAIN/s: Pheromone shutdown-related,                                                                                                                                                                          |                                            |
| Gene | Bra015411 | A10        | 1545292 | 1547891 | +      | Protein of unknown function                                                                                                                                                                                                                           |                                            |
| Gene | Bra015412 | A10        | 1519558 | 1520400 | +      | unknown protein                                                                                                                                                                                                                                       |                                            |
| Gene | Bra015413 | A10        | 1512016 | 1513223 | +      | CCT motif family protein; CONTAINS InterPro DOMAIN/s: CCT domain; regulation of transcription, DNA-templated                                                                                                                                          |                                            |
| Gene | Bra015414 | A10        | 1493502 | 1495987 | +      | Nucleic acid-binding, OB-fold-like protein; CONTAINS InterPro DOMAIN/s: Nucleic acid-binding, OB-fold (InterPro:IPR012340), Nucleic acid-binding, OB-fold-like (InterPro:IPR016027); BEST Arabidopsis thaliana protein match is: F-box family protein |                                            |
| Gene | Bra015415 | A10        | 1457040 | 1466273 | +      | ZIP5; ZIP5; cation transmembrane transporter/ metal ion transmembrane transporter                                                                                                                                                                     |                                            |
| Gene | Bra015416 | A10        | 1428665 | 1430223 | +      | Pectin lyase-like superfamily protein; FUNCTIONS IN: pectinesterase activity; INVOLVED IN: cell wall modification; LOCATED IN: endomembrane system, cell wall, plant-type cell wall                                                                   |                                            |
| Gene | Bra015417 | A10        | 1421987 | 1424875 | -      | molecular_function unknown                                                                                                                                                                                                                            |                                            |
| Gene | Bra015418 | A10        | 1420811 | 1421335 | -      | unknown protein                                                                                                                                                                                                                                       |                                            |

| Item | Name      | Chromosome | Start   | Stop    | Strand | Annotations                                                                                                                                                                                                                                                                                                                                                                   | Orthologous genes to<br><i>A. thaliana</i> |
|------|-----------|------------|---------|---------|--------|-------------------------------------------------------------------------------------------------------------------------------------------------------------------------------------------------------------------------------------------------------------------------------------------------------------------------------------------------------------------------------|--------------------------------------------|
| Gene | Bra015419 | A10        | 1417193 | 1417647 | +      | unknown protein                                                                                                                                                                                                                                                                                                                                                               |                                            |
| Gene | Bra015420 | A10        | 1411928 | 1414844 | +      | NAD(P)-binding Rossmann-fold superfamily protein; FUNCTIONS IN: binding, oxidoreductase activity, acting on the CH-OH group of donors, NAD or NADP as acceptor, catalytic activity, cofactor binding; INVOLVED IN: metabolic process;                                                                                                                                         |                                            |
| Gene | Bra015421 | A10        | 1397416 | 1403688 | +      | Sec14p-like phosphatidylinositol transfer family protein; CONTAINS InterPro DOMAIN/s: Cellular retinaldehyde-binding/triple function, C-terminal (InterPro:IPR001251), Phosphatidylinositol transfer protein-like, N-terminal (InterPro:IPR011074);                                                                                                                           |                                            |
| Gene | Bra015422 | A10        | 1374834 | 1376640 | -      | Protein of unknown function                                                                                                                                                                                                                                                                                                                                                   |                                            |
| Gene | Bra015423 | A10        | 1373100 | 1374498 | +      | unknown protein                                                                                                                                                                                                                                                                                                                                                               |                                            |
| Gene | Bra015424 | A10        | 1371257 | 1372550 | +      | C-8 sterol isomerases; FUNCTIONS IN: C-8 sterol isomerase activity; INVOLVED IN: ergosterol biosynthetic process; LOCATED IN: endoplasmic reticulum;                                                                                                                                                                                                                          |                                            |
| Gene | Bra015425 | A10        | 1369837 | 1370637 | -      | FUNCTIONS IN: DNA binding; INVOLVED IN: regulation of transcription, DNA-dependent;                                                                                                                                                                                                                                                                                           |                                            |
| Gene | Bra015426 | A10        | 1366071 | 1367207 | -      | Encodes a Protease inhibitor/seed storage/LTP family protein                                                                                                                                                                                                                                                                                                                  |                                            |
| Gene | Bra015427 | A10        | 1362513 | 1365797 | +      | Encodes a protein with similarity to RNA helicases. Mutants are defective in post-transcriptional gene silencing.                                                                                                                                                                                                                                                             |                                            |
| Gene | Bra015428 | A10        | 1355996 | 1358258 | +      | Encodes an inositol polyphosphate 5' phosphatase (5PTase) that is required for the proper recruitment of cells into developing vascular tissue in leaves and cotyledons. It is most similar to Type I 5PTases that are known to cleave a phosphate from IP3 or IP4. <i>cvp2</i> mutants have elevated levels of IP3 and are hypersensitive to ABA in seed germination assays. |                                            |

| Item | Name      | Chromosome | Start   | Stop    | Strand | Annotations                                                                                                                                                                                                                                                                                  | Orthologous genes to<br><i>A. thaliana</i> |
|------|-----------|------------|---------|---------|--------|----------------------------------------------------------------------------------------------------------------------------------------------------------------------------------------------------------------------------------------------------------------------------------------------|--------------------------------------------|
| Gene | Bra015429 | A10        | 1347584 | 1348936 | +      | one of Arabidopsis SKP1 homologues;DNA endoreduplication, proteasome assembly, proteasome-mediated ubiquitin-dependent protein catabolic process                                                                                                                                             |                                            |
| Gene | Bra015430 | A10        | 1338748 | 1343684 | +      | chromatin remodeling 31 (chr31); FUNCTIONS IN: helicase activity, DNA binding, ATP binding, nucleic acid binding;                                                                                                                                                                            |                                            |
| Gene | Bra015431 | A10        | 1333362 | 1337079 | -      | ARABIDOPSIS THALIANA SYNAPTOTAGMIN HOMOLOG E, ATSYTE, NTMC2T2.1, NTMC2TYPE2.1, SYNAPTOTAGMIN 5, SYNAPTOTAGMIN HOMOLOG E, SYT5, SYTE                                                                                                                                                          |                                            |
| Gene | Bra015432 | A10        | 1331868 | 1332828 | -      | Protein is tyrosine-phosphorylated and its phosphorylation state is modulated in response to ABA in Arabidopsis thaliana seeds.                                                                                                                                                              |                                            |
| Gene | Bra015433 | A10        | 1323738 | 1325150 | -      | Protein of unknown function                                                                                                                                                                                                                                                                  |                                            |
| Gene | Bra015434 | A10        | 1320225 | 1321339 | -      | unknown protein                                                                                                                                                                                                                                                                              |                                            |
| Gene | Bra015435 | A10        | 1319282 | 1319998 | +      | A UDP-glucose transferase localized in the phragmoplast. It has been co-purified with the callose synthase complex and may transfer UDP-glucose from sucrose synthase to the callose synthase and thus help form a substrate channel for the synthesis of callose at the forming cell plate. |                                            |
| Gene | Bra015436 | A10        | 1307690 | 1317685 | +      | Encodes a callose synthase 1 catalytic subunit . Member of Glycosyltransferase Family- 48.                                                                                                                                                                                                   |                                            |
| Gene | Bra015437 | A10        | 1305378 | 1305626 | +      | unknown protein                                                                                                                                                                                                                                                                              |                                            |
| Gene | Bra015438 | A10        | 1296640 | 1304123 | +      | kelch repeat-containing F-box family protein                                                                                                                                                                                                                                                 |                                            |
| Gene | Bra015439 | A10        | 1295232 | 1296364 | -      | Encodes a gamma-secretase subunit. Associates with other subunits in intracellular membrane compartments                                                                                                                                                                                     |                                            |
| Gene | Bra015440 | A10        | 1288221 | 1293659 | -      | MA3 domain-containing protein; CONTAINS InterPro DOMAIN/s: Initiation factor eIF-4 gamma, MA3; response to ethylene, response to salt                                                                                                                                                        |                                            |

| Item | Name      | Chromosome | Start   | Stop    | Strand | Annotations                                                                                                                                                                                                                                                                                                                                                                                                                                                            | Orthologous genes to<br><i>A. thaliana</i> |
|------|-----------|------------|---------|---------|--------|------------------------------------------------------------------------------------------------------------------------------------------------------------------------------------------------------------------------------------------------------------------------------------------------------------------------------------------------------------------------------------------------------------------------------------------------------------------------|--------------------------------------------|
|      |           |            |         |         |        | stress                                                                                                                                                                                                                                                                                                                                                                                                                                                                 |                                            |
| Gene | Bra015441 | A10        | 1273310 | 1276177 | +      | unknown protein                                                                                                                                                                                                                                                                                                                                                                                                                                                        |                                            |
| Gene | Bra015442 | A10        | 1262689 | 1267016 | +      | member of Putative Na <sup>+</sup> /H <sup>+</sup> antiporter family                                                                                                                                                                                                                                                                                                                                                                                                   |                                            |
| Gene | Bra015443 | A10        | 1257619 | 1259136 | -      | Tetratricopeptide repeat (TPR)-like superfamily protein; CONTAINS InterPro DOMAIN/s: Pentatricopeptide repeat                                                                                                                                                                                                                                                                                                                                                          |                                            |
| Gene | Bra015444 | A10        | 1254138 | 1256320 | +      | Encodes the small subunit of ADP-glucose pyrophosphorylase. The small subunit is the catalytic isoform responsible for ADP-glucose pyrophosphorylase activity. The presence of the small subunit is required for large subunit stability. Two isoforms of the small subunit (ApS1 and ApS2) have been described. ApS2 is a minor small subunit isoform present in all plant tissues tested.                                                                            | AT1G05610                                  |
| Gene | Bra015445 | A10        | 1245447 | 1250315 | -      | Encodes an inositol polyphosphate 5-phosphatase with phosphatase activity toward only Ins(1,4,5)P <sub>3</sub> . Induced in response to ABA and wounding treatments. Expressed in young seedlings and flowers, while no transcripts were detectable in matured roots, stems, and rosette leaves Modulates the development of cotyledon veins through its regulation of auxin homeostasis. Involved in blue light light - stimulated increase in cytosolic calcium ion. |                                            |



| Item | Name      | Chromosome | Start   | Stop    | Strand | Annotations                                                                                                                                                                                                                                                                                                                                                                                                                                                                                                                                                                                                                                                              | Orthologous genes to<br><i>A. thaliana</i> |
|------|-----------|------------|---------|---------|--------|--------------------------------------------------------------------------------------------------------------------------------------------------------------------------------------------------------------------------------------------------------------------------------------------------------------------------------------------------------------------------------------------------------------------------------------------------------------------------------------------------------------------------------------------------------------------------------------------------------------------------------------------------------------------------|--------------------------------------------|
| Gene | Bra015446 | A10        | 1242799 | 1244786 | +      | Pectin lyase-like superfamily protein; FUNCTIONS IN: polygalacturonase activity; INVOLVED IN: carbohydrate metabolic process; LOCATED IN: endomembrane system; CONTAINS InterPro DOMAIN/s: Pectin lyase fold/virulence factor (InterPro:IPR011050), Pectin lyase fold (InterPro:IPR012334), Glycoside hydrolase, family 28 (InterPro:IPR000743), Parallel beta-helix repeat (InterPro:IPR006626); BEST Arabidopsis thaliana protein match is: Pectin lyase-like superfamily protein (TAIR:AT1G05660.1); Has 4025 Blast hits to 4009 proteins in 482 species: Archae - 4; Bacteria - 1133; Metazoa - 14; Fungi - 1282; Plants - 1474; Viruses - 2; Other Eukaryotes - 116 | AT1G05650                                  |
| Gene | Bra015447 | A10        | 1239460 | 1240770 | +      | Pentatricopeptide repeat (PPR-like) superfamily protein; CONTAINS InterPro DOMAIN/s: Pentatricopeptide repeat                                                                                                                                                                                                                                                                                                                                                                                                                                                                                                                                                            |                                            |
| Gene | Bra015448 | A10        | 1234249 | 1235828 | +      | Encodes a UDP-glucosyltransferase, UGT74E2, that acts on IBA (indole-3-butyric acid) and affects auxin homeostasis. The transcript and protein levels of this enzyme are strongly induced by H <sub>2</sub> O <sub>2</sub> and may allow integration of ROS (reactive oxygen species) and auxin signaling. This enzyme can also transfer glycosyl groups to several compounds related to the explosive TNT when this synthetic compound is taken up from the environment.                                                                                                                                                                                                | AT1G05680                                  |
| Gene | Bra015449 | A10        | 1224561 | 1230577 | -      | Leucine-rich repeat transmembrane protein kinase protein; FUNCTIONS IN: kinase activity; INVOLVED IN: protein amino acid phosphorylation; ATP binding, kinase activity, protein serine/threonine kinase activity                                                                                                                                                                                                                                                                                                                                                                                                                                                         |                                            |
| Gene | Bra015450 | A10        | 1216923 | 1217712 | -      | basic helix-loop-helix (bHLH) DNA-binding superfamily protein; FUNCTIONS IN: sequence-specific DNA binding transcription factor activity; INVOLVED IN: response to ethylene stimulus, regulation of                                                                                                                                                                                                                                                                                                                                                                                                                                                                      |                                            |

| Item | Name      | Chromosome | Start   | Stop    | Strand | Annotations                                                                                                                                                                                                                                                                                                                                                                                                                                                         | Orthologous genes to<br><i>A. thaliana</i> |
|------|-----------|------------|---------|---------|--------|---------------------------------------------------------------------------------------------------------------------------------------------------------------------------------------------------------------------------------------------------------------------------------------------------------------------------------------------------------------------------------------------------------------------------------------------------------------------|--------------------------------------------|
|      |           |            |         |         |        | transcription;                                                                                                                                                                                                                                                                                                                                                                                                                                                      |                                            |
| Gene | Bra015451 | A10        | 1213098 | 1213994 | +      | Specifically restrict the long-distance movement of tobacco etch potyvirus (TEV) without involving either hypersensitive cell death or systemic acquired resistance                                                                                                                                                                                                                                                                                                 |                                            |
| Gene | Bra015452 | A10        | 1210894 | 1211871 | -      | Got1/Sft2-like vesicle transport protein family                                                                                                                                                                                                                                                                                                                                                                                                                     |                                            |
| Gene | Bra015453 | A10        | 1206499 | 1210198 | -      | lipase class 3 family protein; FUNCTIONS IN: triglyceride lipase activity; INVOLVED IN: lipid metabolic process                                                                                                                                                                                                                                                                                                                                                     | AT1G05790                                  |
| Gene | Bra015454 | A10        | 1197888 | 1199309 | -      | Encodes a galactolipase. Located in the chloroplast. Involved in the initial step of jasmonic acid biosynthesis. Expressed in vegetative tissues and is necessary for the biosynthesis of basal-level JAs in vegetative tissues.                                                                                                                                                                                                                                    |                                            |
| Gene | Bra015455 | A10        | 1184401 | 1185162 | +      | Arabidopsis thaliana telomere-binding protein, putative                                                                                                                                                                                                                                                                                                                                                                                                             |                                            |
| Gene | Bra015456 | A10        | 1177878 | 1180605 | -      | basic helix-loop-helix (bHLH) DNA-binding superfamily protein; FUNCTIONS IN: DNA binding, sequence-specific DNA binding transcription factor activity; INVOLVED IN: regulation of transcription;                                                                                                                                                                                                                                                                    |                                            |
| Gene | Bra015457 | A10        | 1167425 | 1169001 | +      | Encodes an endo chitinase-like protein AtCTL1. Essential for tolerance to heat, salt and drought stresses. Also involved in root hair development, cell expansion and response to cytokinin. Allelic to erh2. 11 alleles described in Hauser (1995). Mutant is defective in acquired thermotolerance, appears semidwarf throughout its life cycle and has extra lateral branches. There are two EMS alleles. Expression of AtHSP101 is not affected in the mutants. |                                            |
| Gene | Bra015458 | A10        | 1165587 | 1166566 | -      | unknown protein                                                                                                                                                                                                                                                                                                                                                                                                                                                     |                                            |
| Gene | Bra015459 | A10        | 1163760 | 1164402 | +      | Protein of unknown function                                                                                                                                                                                                                                                                                                                                                                                                                                         |                                            |

| Item | Name      | Chromosome | Start   | Stop    | Strand | Annotations                                                                                                                                                                                                                                                                                                 | Orthologous genes to<br><i>A. thaliana</i> |
|------|-----------|------------|---------|---------|--------|-------------------------------------------------------------------------------------------------------------------------------------------------------------------------------------------------------------------------------------------------------------------------------------------------------------|--------------------------------------------|
| Gene | Bra015460 | A10        | 1157877 | 1160540 | -      | Encodes ARI12 (ARIADNE 12). ARI12 belongs to a family of 'RING between RING fingers' (RBR) domain proteins with E3 ligase activity. Expression of ARI12 is induced by UV-B exposure; cellular response to hypoxia, protein ubiquitination, response to UV-B, transcription factor import into nucleus       |                                            |
| Gene | Bra015461 | A10        | 1154023 | 1157628 | +      | encodes a protein whose sequence is similar to a 2-oxoglutarate-dependent dioxygenase; metal ion binding, oxidoreductase activity, acting on paired donors, with incorporation or reduction of molecular oxygen, 2-oxoglutarate as one donor, and incorporation of one atom each of oxygen into both donors |                                            |
| Gene | Bra015462 | A10        | 1148443 | 1150365 | -      | Encodes a member of the proline-rich extensin-like receptor kinase (PERK) family. This family consists of 15 predicted receptor kinases; plant-type cell wall modification, pollen tube development, pollen tube growth, protein autophosphorylation, regulation of unidimensional cell growth              |                                            |
| Gene | Bra015463 | A10        | 1138842 | 1143350 | -      | zinc ion binding, nucleic acid binding;                                                                                                                                                                                                                                                                     |                                            |
| Gene | Bra015464 | A10        | 1131509 | 1136920 | -      | cell division cycle protein 48-related / CDC48-related; FUNCTIONS IN: nucleoside-triphosphatase activity, nucleotide binding, ATP binding;                                                                                                                                                                  |                                            |
| Gene | Bra015465 | A10        | 1130267 | 1130944 | -      | DNA binding; INVOLVED IN: regulation of transcription, DNA-dependent                                                                                                                                                                                                                                        |                                            |
| Gene | Bra015466 | A10        | 1124637 | 1129429 | +      | ARM repeat superfamily protein; FUNCTIONS IN: binding;                                                                                                                                                                                                                                                      |                                            |
| Gene | Bra015467 | A10        | 1121510 | 1123796 | +      | RNA-binding (RRM/RBD/RNP motifs) family protein;                                                                                                                                                                                                                                                            |                                            |
